# Supplementary material for: Global scale gravity wave analysis methodology for the ESA Earth Explorer 11 candidate CAIRT
Source: Copernicus journal article supplement (doi:10.5194/egusphere-2024-1084), 2024-04-29
Supplement: Supplementary file [file egusphere-2024-1084-AC1-supplement.pdf]

# 1 Response Referee No. 1

We thank the reviewer for the thorough review of our article. The comments and suggestions were very helpful in improving the presentation of our work and refining the science.

The responses to specific comments are given below. The original reviewer comments are given in italic and any text given in blue has been added to the manuscript in response to the comment.

## 1.1 Overall comment

*In this manuscript, the motivation for and the methodology of the atmospheric gravity wave research using The ESA Earth Explorer 11 candidate CAIRT is outlined and demonstrated. The prospective CAIRT mission would have an enormous impact on the atmospheric dynamics and transport research and for research of the middle atmosphere in general. Here, a group of world leading experts presents a cutting edge methodology that documents the ability of CAIRT to derive unprecedented information on the GW field and wave-mean flow interaction. The paper is clearly structured and very well written and I can recommend it for publication after the authors revise some technical issues and typos that I list below.*

*However, I feel that besides being just published, the paper has a potential to become a highlight paper and to have a really big impact on the community. But, sadly, I feel that in the current form the paper falls short of that, esp. in terms of readability of the text. Hence, I also give below some editorial comments/suggestions that should not prevent publication but if the authors pick them, they can possibly help improving the paper in this regard.*

## 1.2 Specific comments

1. L25 - On breaking...

Rephrased to: "The GWs release this momentum [when breaking](#),..."

2. L30 ..GWs are of small horizontal scales compared to climate model resolutions and are, hence, not well taken into account for long-term projections..This is a low quality sentence. I think that the issue of underrepresentation of parts of GW spectra in climate and global weather prediction models deserves a more thorough discussion. Also, there should be a paragraph on how the unresolved effects are included (parameterizations). Clearly distinguishing between orography and non-orography GWs and highlighting how important the parameterizations are for climate models (for orography GWs - e.g. impact on SSW frequency Sigmond et al. (2023, GMD), Fig. 18); impact on stratospheric dynamics in general (Hajkova and Sacha, 2024, CliDyn) and for non-oro GW schemes e.g. Choi et al. (2018, Asia-Pacific J Atmos Sci)

The following paragraph has been added to address this point:

["Even modern climate models are not able to resolve the full GW spectrum due to limited spatial resolution and hence the unresolved GWs are parameterized to approximate their effects. Non-orographic and orographic GWs are considered separately due to their distinct phase speed spectra and source processes. Both types are crucial for the performance of the climate model in long-term projections. For instance, they influence the frequency of SSW events \[Sigmond et al., 2023, , Fig. 18\] and the general dynamics of the stratosphere \[Hájková and Šácha, 2024\] for the orographic component and impact the QBO frequency \[?Bushell et al., 2020, Richter et al., 2020\] and forecasting performance \[Choi et al., 2017, 2018, Kautz et al., 2020\] for the non-orographic component. A better representation of these unresolved GWs creates the need for direct observations to further understand their role in atmospheric processes."](#)

3. L43..costly infrastructure.. the people working with ground based measurements on the other side argue that the ground based measurements are very cost effective compared to satellite obs. Can you substantiate your claim here?

Indeed this was laid out misleadingly. The sentence was changed to: "In addition, also remote sensing instruments have been deployed on research aircraft in dedicated GW campaigns [Fritts et al., 2016, Krisch et al., 2017, Rapp et al., 2021] [and radiosondes are launched daily in a worldwide network."](#)

4. L84 ..intermittency - Here, again would be useful to distinguish between non-orographic and orographic parameterizations, where the issue of intermittency has been also discussed (e.g. Kuchar et al. (2020, WCD))

Good point, a sentence on this was added to the manuscript: ["It is noteworthy that the intermittency is very different for orographic \(high intermittency and seasonality\) and non-orographic \(comparatively low intermittency\) GW parametrization schemes \[Kuchar et al., 2020\]."](#)

5. *L89 ...propagate..here your discussion is inaccurate. GWs in the parameterizations (outside MS-GWaM) do not propagate at all. Only the saturation criterion is evaluated in a vertical column. Again, I argue that a paragraph devoted to importance and limitations of GW parameterizations is needed.*

The corresponding text was changed to: "It became evident, though, that GW parameterizations neglect an important feature of GWs, i.e., that GWs in the real atmosphere **spread** not only vertically, as assumed in the parametrizations, but also laterally. **In addition, no real vertical propagation is modeled (including group velocity and possible horizontal refraction) but a check of the saturation criteria within the column is performed. ...**"

6. *L93..a major part...I would say that for current GCMs it would be more accurate to say some part of the GW spectrum (their effective resolutions are much worse than simply their horizontal resolution).*

Indeed, the major is a bit of an overstatement considering GCMs. We changed the text as you suggest: "...resolving **the meso- to long-scale part** of the GW spectrum..."

7. *L99 the whole spectrum of GWs - again for accuraccy I would say almost the whole spectrum*  
Agree, changed as you suggest.

8. *L135 .. and that it is possible from the aircraft - please rewrite*

The edited sentence now reads: "The studies demonstrate that high-accuracy wave determination is required for the scientific need and **that airborne observations can deliver the necessary data of sufficient quality.**"

9. *L150 depends its*

Changed to: "...the result depends **on the** configuration..."

10. *L159 .. , from where the SSW propagates downward.- This is certainly not true for the SSWs in general.*  
This subordinate clause has been removed.

11. *L161 For agreeing results - rewrite.*

We changed the sentence to: "**To achieve consistent results, the GW parameters must be known with high accuracy; therefore, a discussion on the impact of instrument noise on these spectra is presented.**"

12. *L165 GCM model data - rewrite*

The sentence has been changed to: "**This paper begins with an overview of the high-resolution GCM data and simulated CAIRT retrievals used for the assessment.**"

13. *L169 - here you say that you use NWP not GCM data..*

Corrected in the new revision.

14. *L173 Sec .6*

Corrected to "**Sec. 6**"

15. *L176 an estimate of an actual observation - an estimate of a potential observation?*

Agree, this would be more precise. We changed the manuscript accordingly.

16. *L179 comparison to model data is based on model data - rephrase*

This sentence was changed to: "The bulk of the simulated observations and following analysis , as well as the comparison to model data, is based on the Integrated Forecast System (IFS) of the European Centre for Medium-Range Weather Forecasts (ECMWF)."

17. *around L229 Is interpolation really the correct way and should not the spatial averaging be used to mimic what the coarse resolution instrument would see?*

Indeed a spatial averaging using the correct kernel of the instrument would be the ideal way to treat the conversion from model to instrument data. The interpolation used here is an approximation but our assumption is that the along-track smoothing of the retrieval dominates.

The corresponding section has been expanded with another note: "**As an approximation, the model data is interpolated to the "retrieval" grid** using a spline interpolation. Note that the resolution of the model data is finer than the observation sampling grid, and thus, the interpolation error will be small. A spline interpolation has been used because a simple linear interpolation tends to reduce GW amplitudes, which shall be avoided for a realistic comparison between simulated observations and original model data. **Further note, that the retrieval will strongly smooth the temperature in along-track direction. The pixel width in across-track direction, however, is neglected.**"

18. *Tab. 1 - I would prefer additional column showing the meaning of the numbers (e.g. band, range or something). As it is now, you do not need a table.*

We incorporated the spectral bands into the main text and removed Tab. 1: "These spectral bands capture the strong emissions of three  $CO_2$  Q-branches (719.0  $cm^{-1}$  – 721.0  $cm^{-1}$ , 741.0  $cm^{-1}$  – 741.8  $cm^{-1}$ , and 791.0  $cm^{-1}$  – 792.4  $cm^{-1}$ ) as well as an atmospheric window (831.0  $cm^{-1}$  – 832.0  $cm^{-1}$ ) to provide a background value."

We added a column of the relevant emitter in the respective spectral bands, i.e., whether it's a  $CO_2$  Q-branch of the atmospheric window.

19. *L255 vertical flux of horizontal pseudomomentum - please state clearly that you are computing only a simplified version of the vertical flux of horizontal pseudomomentum valid under certain assumptions*

The following sentence was added to note the limitation and give the reference for more detail:

"...component, see Sec. 3.1). Note that this analysis is limited by the assumption that the background atmosphere allows for the WKB limit [Fritts and Alexander, 2003]. The..."

20. *L277 We all know that the Earth is not a sphere*

Yes, that's true, we meant to address the periodicity along the longitude. We changed the sentence as follows to better convey and clarify what we wanted to say:

Due to periodicity along a latitude circle, the zonal mean always covers a multiple of the wavelength of any wave in zonal direction, and hence, the zonal mean of the zonal momentum flux,  $F_x$ , can be used as a valid reference for the comparison.

21. *L277 ..comprises always a multiple of full wavelengths of any wave in zonal direction...I do not understand this, certainly not all wavelengths satisfy this.*

See comment above.

22. *L278  $F_x$ , is a true reference ...I do not understand the meaning of this statement.*

See comment above.

23. *L280 is not a true reference...the same as above.*

Accordingly to the previous comment, the sentence was changed to: "...shows oscillations and can not be taken as a fully valid comparison reference."

24. *L281 ..For the closure of the momentum budget, the pseudo-momentum flux needs to be calculated.. - The momentum budget can certainly be closed without pseudo-momentum, only it takes a less elegant form. Also, you should be aware that you compute only a very simplified form of a pseudo-momentum (homogenous background winds..).*

Agree and, in particular, this sentence was not what we intended to convey. It is change in the revised manuscript to:

"For GWs, the pseudo-momentum flux is the quantity to consider for the interaction with the mean flow [Fritts and Alexander, 2003]."

25. *L297.. linked to the temperature amplitude (Ern et al., 2004) - again, include assumptions of this link (mid-frequency range etc.)*

The sentence has been changed to: "The GWMF values, which are directly linked to the temperature amplitudes [valid in the WKB limit, Ern et al., 2004], are therefore representative of the volume of the refit.

26. *L347  $Ch^2$  squared was not defined before?*

This has been changed to:  $(f(\vec{x}) - y(\vec{x}))^2 + P(\vec{k})$

In addition, the following sentence was added: "Here,  $y(\vec{x})$  are the observed or modeled temperature values at the corresponding locations  $\vec{x}$ ."

27. *L349-L356 and the whole subsection - There is so much of text and too few formulas or visualization. It is really hard to follow the rationale behind the penalty in particular..*

Indeed, this section was not very helpful with the details on the penalty function. Therefore, the section has been rewritten as follows:

We choose the penalty function  $P$  as a squared cosine function truncated at the first minimum:

$$P(\vec{k}) = \sum_{i=1}^3 \begin{cases} 0 & |k_i| < w_i \\ h_i \cos^2 \left( \frac{\pi}{2} \frac{|k_i| - k_{\text{ny}}}{w_i} \right) & \text{else} \end{cases}, \quad (1)$$

where  $k_i$  are the components of the wave vector  $\vec{k}$  and  $k_{\text{ny}}$  is the Nyquist wave number, i.e., the highest resolvable wave number. The free parameters are the penalty heights,  $h_i$ , and widths,  $w_i$ , and the normalization is chosen such that the penalty smoothly transitions from  $h_i$  at the Nyquist wave number to 0 at  $|k_i| = k_{\text{ny}} - w_i$ . Throughout our analysis, the penalty widths  $w_i$  are chosen as 0.8 times the spectral sampling in all three spatial dimensions. The penalty heights,  $h_i$ , need to be adapted in a way that most of the fitted noise is removed from the results. Still remaining solutions close to Nyquist limit are removed in the post processing.

28. *L367 ..local phenomena cancel in the zonal mean... for the zonal mean, GWDxx averages out by definition, but not the components connected with local meridional propagation*

Indeed, we hope to clarify this by the following changes: "In general, it is expected that these local phenomena cancel for the zonal direction in the zonal mean and a general trend remains visible. However, even the zonal mean may show signs of lateral propagation in the meridional direction."

29. *L396 ..local events...-¿local peaks?*

Agree, changed as suggested.

30. *Figure 4..panel a)... panel b)...*

Corrected as suggested.

31. *Paragraphs around L445 and 450 - Please rewrite this section of results in a more consistent manner and do not jump between Fig. 5 and Fig. 6*

We changed the corresponding part to:

"Similarly, the eastward maximum in the southern subtropics and the westward maximum in the northern mid and high latitudes are predominantly composed of eastward and westward propagating waves, respectively. The east-west distribution will vary under different meteorological conditions. The zonal mean generated from the S3D data aligns very well with the general pattern and magnitude. Only at around 38°N, the S3D method underestimates the GWMF in comparison to the GWMF derived directly from the wind fluctuations. All in all, this shows that the S3D method is a valid tool for the estimation of GW distributions from model and satellite data.

The good matching quality is also evident in the meridional GWMF (Fig. 6a), which is separated into northward and southward directed waves. The GWMF shows notable compensation between these components, as will be demonstrated more clearly in the phase speed spectra in Sec. 4.3."

32. *L489 In general, the good resemblance of the reference phase speed spectrum gives confidence that CAIRT would see a representative sample to estimate the full GW phase speed spectrum even in the case of higher-than-expected noise...Based on the figure, I am afraid that this is true only for the slow, likely orographic GWs. It seems like the non-orographic part (modes with large phase speeds) will be increasingly plagued by artificial signals. This can influence reliability of the ray tracing. Generally I think that it would be good to separate a little bit more between OGWs and non-OGWs in description of your results (I know that it is impossible to distinguish clearly between them).*

To investigate the different effects of the retrieval on phase speed spectra for orographic and non-orographic GWs, we have added a section to the Appendix. There, we look at phase speed spectra for the subtropics as a proxy for non-orographic GWs and the mid to high latitudes for orographic GWs. Of course the separation is not perfectly valid but only an approximation.

The section reads as follows:

#### **Appendix A: Latitude-separated phase-speed spectra**

Different parts of the wave spectrum can be investigated by restraining the analysis to the regions where these predominantly occur. In this case, we separate the analysis region to the (southern) subtropics, 35°S to 5°N, where mostly non-orographic GWs are expected, and to the northern mid and high latitudes, 30°N to 85°N, where orographic GWs play a dominant role. Fig. R1 and R2 show the phase-speed spectra for both regions, respectively.

The separated parts of the spectrum show more-or-less the same results as shown in Fig. 7. The phase-speed spectra degrade in a similar way with increasing noise levels. In particular, the subtropic phase-speed

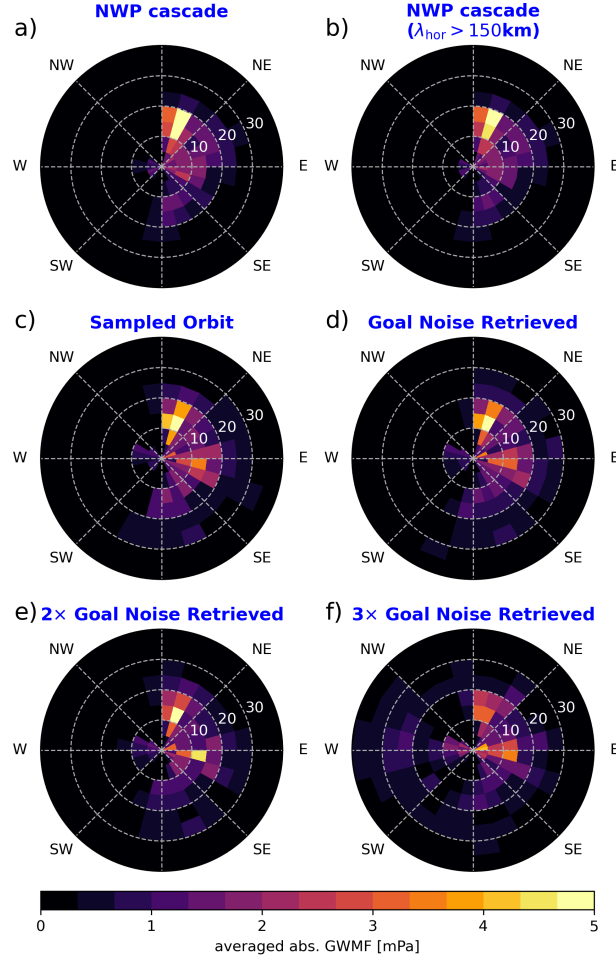

Figure R1: Comparison of averaged phase-speed spectra for 35°S to 5°N and all longitudes for NWP data of 3rd January 2006 analyzed by an S3D cascade (a), the same data but limited to horizontal wavelengths of 150 km and longer (b), data sampled to CAIRT grid (c), and end-to-end simulated retrievals with various noise levels (d-f).

spectra in Fig. R1 show good agreement with the reference except for the highest noise levels. The mid and high latitudes in Fig. R2 show, as expected, slower phase speeds but also a strong reduction in GWMF from the filtering of horizontal wavelengths shorter than 150 km. The sampling to the orbit itself introduces some artifacts at higher phase speeds and dilutes the direction of the spectrum. Considering the retrieval noise, the spectrum only further degrades when the noise reaches three times the goal noise level.

To quantify the deterioration of the phase speed spectra, we calculated the circular variances weighted with the GWMF of the individual waves and the weighted mean phase speeds for the different situations in Fig. R3a and b, respectively.

The circular variance is calculated via:

$$Var = 1 - \frac{1}{\sqrt{\sum_i F_i}} \sqrt{\left( \sum_i F_i \cos \theta_i \right)^2 + \left( \sum_i F_i \sin \theta_i \right)^2}, \quad (2)$$

where  $\theta_i$  is the direction of the GW and  $F_i$  is the GWMF carried by GW  $i$ . This variance is 0 if all waves point in the same direction and 1 if their pointing is uniformly distributed.

The phase speed spectra for the subtropical region shows a distinct directionality, which is also captured by the circular variance in Fig. R3 a. By sampling to the orbit data, this directionality is reduced to some extent. When retrieval noise is introduced, the direction of the spectrum is recovered well for the goal noise but almost vanishes with threefold noise, giving a circular variance of 0.8 indicating almost no distinct pointing direction. The weighted mean phase speed, on the other hand, is strictly increasing

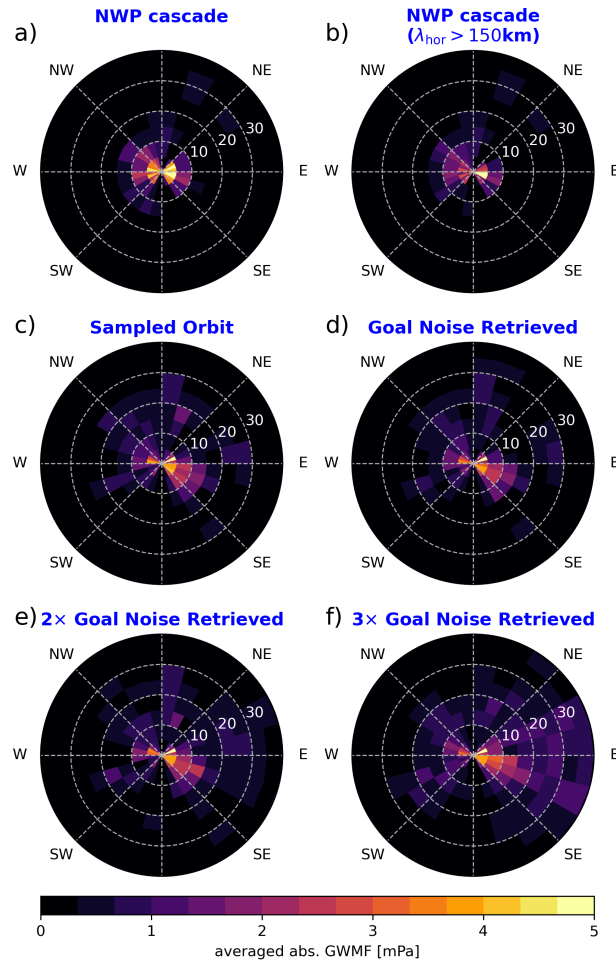

Figure R2: Same as Fig. R1 but for latitudes between  $30^{\circ}\text{S}$  to  $85^{\circ}\text{N}$

when sampled onto the orbit. This is also visible directly in the phase-speed spectra, where the center part gets spread to higher phase speeds, indicating that the spectrum itself shifts to higher phase speeds. Introducing retrieval noise further continues this trend of reduced circular variance and increased mean phase speed. Both measures together indicate that in case of subtropical GWs, the artifacts due to retrieval noise introduced in the spectra are non-directional and mostly in the higher phase speeds and are not easily distinguishable from the actual spectrum.

In the mid to high latitudes, the circular variance decreases strongly compared to the model simulations, where it is almost 1 due to the two dominant directions. The sampled and retrieved data are missing part of the westward GWs, leading to a reduction in circular variance. With increasing retrieval noise, the circular variance decreases further, indicating that the noise in this situation has a small directionality (which can also be seen in Fig. R2f). Just as in the subtropics, the weighted mean phase speed increases with increasing noise. This effect is, however, smaller since the phase-speed spectrum already shows faster waves (around  $12.5\text{ ms}^{-1}$ ) in the full model. Considering both cases, we could say that the noise manifests as GWs with a phase speed around  $15\text{ ms}^{-1}$ .

33. L504 - From Fig. 2, by eye, it seems that the biggest GWMF values are seen above Japan, but in Fig. 8 this is not that clear. Is it only due to subjective perception or is it likely a result of filtering of shorter waves?

Both are a likely reason here. For one, we replaced Fig. 2 with the one displayed in Fig. R4. The white coastlines in combination with the chosen color map has increased the visibility of the region around Japan. And, as you mention, the horizontal wavelengths around Japan are fairly short in comparison (around 200 km).

34. L531 ..GWs assume long vertical wavelengths..please rephrase

This sentence has been rephrased to: "The background wind velocity is a crucial factor influencing the GWMF distribution because GWs tend to have long vertical wavelengths and can reach their largest amplitudes when propagating against strong background winds [Preusse et al., 2006]."

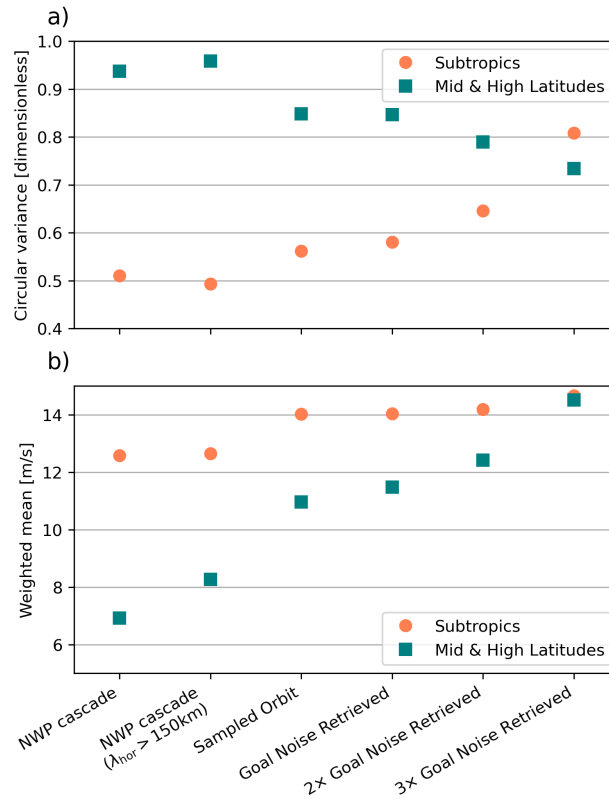

Figure R3: Circular variances and weighted mean phase speeds for the phase-speed spectra shown in Figs. R1 and R2. Subtropics are shown in orange circles, mid & high latitudes in teal squares.

35. L576.. *As a rule of thumb...rephrase and rather state the assumptions behind this estimate*

This sentence has been changed to: "In mid-frequency approximation and in the stratosphere, where  $N \approx 0.02 \text{ s}^{-1}$ , 3 km vertical wavelength corresponds to about  $10 \text{ ms}^{-1}$  (intrinsic) phase speed."

36. L609.. *panel a) ...panel b)*

Changed as suggested.

37. *Figure 15.... Zonal mean zonal GWMF (a, b) and zonal mean zonal drag (c, d, e) deduced from JAGUAR model wind fluctuations (a, c), from CAIRT-sampled data (e), and from end-to-end simulations including radiative transfer, instrument noise and retrieval (b, d)...It is so difficult to understand this caption, please rewrite..*

Indeed, the caption was confusing. We changed it to:

"Zonal mean zonally directed GWMF derived from JAGUAR wind fluctuations (a) and from S3D analysis of the end-to-end simulated CAIRT temperature (b). Panels c)–e) show the zonal mean GW drag derived from the JAGUAR wind fluctuations (c), end-to-end simulated CAIRT temperature (d), and model data sampled to the CAIRT grid (e)."

38. *around L653 .... The comparison to the S3D analysis directly applied to the JAGUAR data (Fig. 17b and d) confirms the strong bias to the orbit tracks at 25 km. This bias is alleviated to some extent at 45 km altitude and the most prominent large-scale structures are resembled within the ray-tracing simulation. Also note that the ray tracing results are better at resembling larger scale structures simply due to more and stronger GWs being present in these regions (e.g., southern subtropics, Himalaya, and Scandinavia)....The discussed features are really hard to see and follow. It would be better to find a way of presenting this to get more quantitative.*

Actually the JAGUAR data in the second column of Fig. 17 was very misleading as the shown data was the wrong altitude. This has been resolved by exchanging it for the following figure, where also the color scale has been extended:

A further quantification of the ray tracing approach is planned for a follow-up study.

39. *Figure 18 and general - Opposed to tracing GWs to sources, I am not convinced about the utility of ray tracing for deriving GWD estimates. Are you not working outside of the underlying ray tracing*

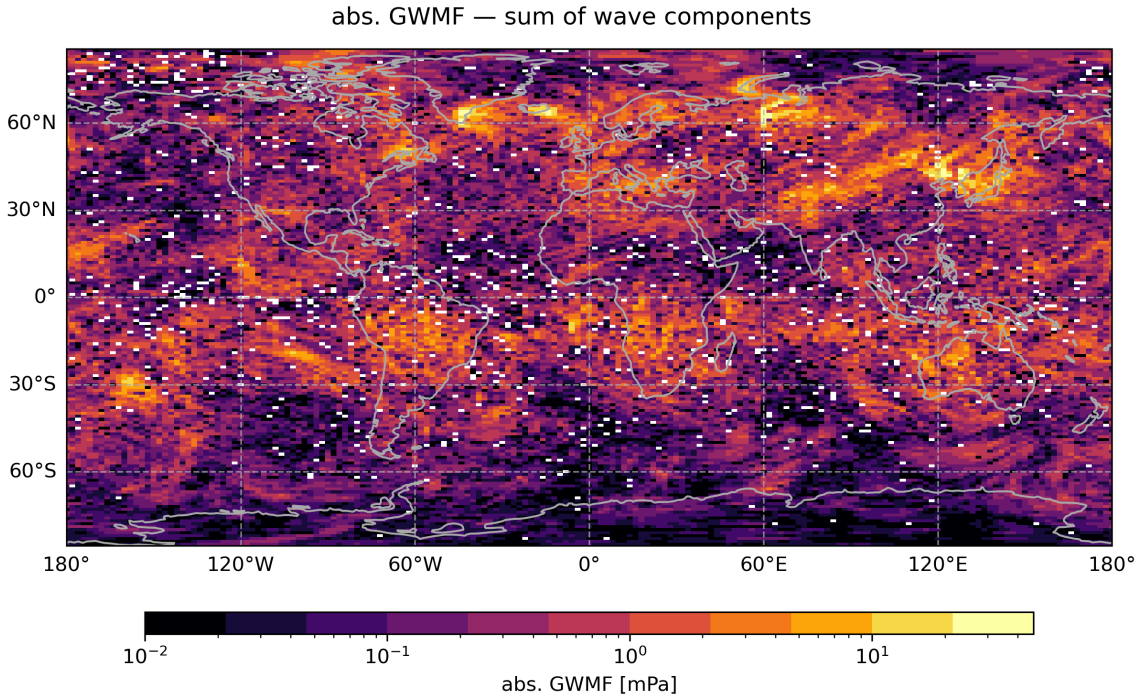

Figure R4: GWMF estimated from the S3D wave analysis cascade with cuboid sizes given in Tab. 2 applied to the ECMWF IFS data. Shown is the sum of all four wave components at 25 km altitude for 3 January 2006 at 12:00 UTC.

*assumptions? On the other side, I acknowledge that the resulting zonal mean drag in Fig. 18 indeed looks more "realistic".*

Indeed, we are close to the limits of (linear) ray tracing. In particular, when GWs approach a critical level, the assumptions become invalid and the ray tracing breaks down. In our setup, however, we stop the ray tracing below a critical level before non-linear effects become a problem.

But of course, the approach using ray-tracing is still an approximation, albeit one that has been successfully tested with GW measurements by Krasauskas et al. [2023]. GW parameterizations use similar approximations of linearity and sub-sequentially derive the drag and we believe this is a better approximation, although still not 100% correct.

40. L666... *deviated as the vertical derivative...*

"deviated" has been replaced by "calculated".

41. L680... *(e.g. ??)...*

Ooops, this should have been Schoeberl and Newman [1995] and Hegglin et al. [2004]. Corrected in the revised version

42. L689.. *They inspired the development of global atmospheric models. -¿ I think that you want to say.. They inspired the development of GW parameterizations in global atmospheric models.*

Indeed, we did not want to say that satellites have inspired GCMs as a whole. Changed as suggested.

43. L710 ...*(also, without penalty, the target range of wavelengths is not reliable; not shown)..maybe this should be shown at a relevant place of the manuscript, because I have found the penalty discussion hard to follow earlier in the text.*

We hope that the updated discussion of the Nyquist penalty is more clear such that this part of the conclusion can be followed more easily. In addition, the corresponding sentence has been modified as follows:

"For CAIRT retrievals, a Nyquist penalty has to be included, which rids the obtained wave spectrum of nonphysical and noise-like waves **at the shortest theoretically resolvable scales** (also, without penalty, the target range of wavelengths is not reliable; not shown)."



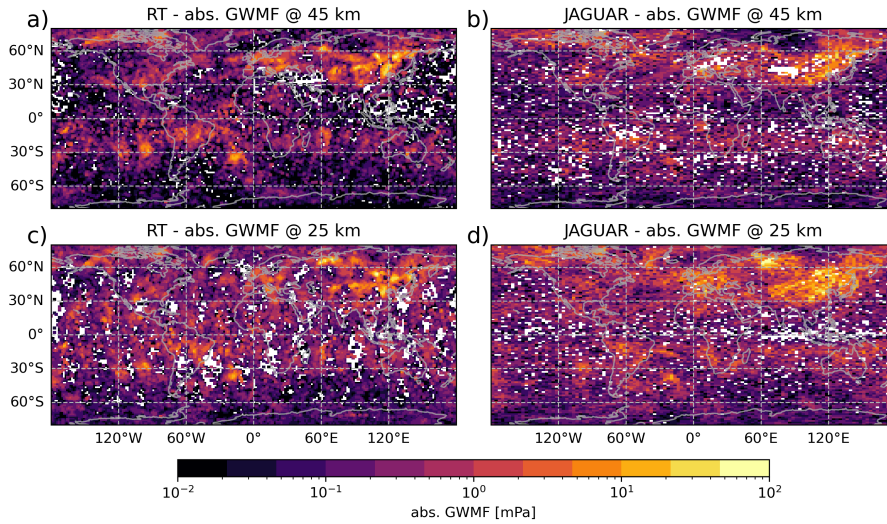

Figure R5: Absolute GWMF from ray tracing experiment. The rays were initialized from the S3D analyses data of 18th December 2018 00:00 UTC at 15, 20, 25, 30, and 35 km altitude from the JAGUAR simulations (see Sec. 5.3). Panels (a) and (b) show the resulting absolute GWMF at 45 km and 25 km, respectively.

### 1.3 General comments

44. *Figs. 8, 9, 15, 16..Instead of subjectively interpreting the information seen in the swaths, can you come with some more quantitative way of presenting these results? (less prone to subjective perception).*

For a quantification of the deterioration of the global maps in Figs. 8 and 9, we added the following paragraphs:

The deterioration of the GWMF retrieval due to noise can be quantified by comparing the simulated GWMF for all retrieval setups to the results estimated from the temperature sampled directly to the orbit. This comparison is shown in Fig. R6. In the perfect case, the panels would show a straight line corresponding to unity. The deviation from this line gives a measure of the uncertainty in the GWMF estimation due to noise and can be quantified by the root-mean-square deviation (RMSD) to the reference data set. For low noise levels up to doubled goal noise, the retrieval performs reasonably well. For the sum of all WCs, most of the retrieved GWMF values are close to the center and the RMSD is around 0.5-0.6 mPa (Fig. R6a and b). The distribution significantly widens in the triple goal noise simulation (Fig. R6c), where the RMSD increases to about 0.8 mPa. However, a general correspondence between the reference and the retrieval-noise data is still seen, indicating that the summed GWMF distribution is still fairly usable even in the worst case scenario.

This is not true if we look at the second wave component individually (Fig. R6d-f). The scatter distribution widens visibly with doubled noise and is almost homogeneously distributed with tripled noise. This is also reflected by the RMSD, which increases from 0.32 mPa to 0.46 mPa. Note that these values are much more severe as in Fig. R6a-c considering the lower GWMF detected in the second wave component.

With respect to Figs. 15 and 16, an appendix section has been added:

#### Assessment of JAGUAR simulations

For a quantification of the matching between the GWMF and GW drag estimated from JAGUAR directly from the wind fluctuations on the one hand and S3D applied to retrieved temperatures on the other hand shown in Fig. 15, Fig. R7 shows the respective correlations across the full altitude range. In particular, the correlation of zonal mean GWMF is very high (0.92) up to about 65 km. Above this altitude, the retrieval deteriorates to some extent but the correlation still reaches about 0.8. Note that the correlation does not capture the bias between both data sets. The simulated CAIRT observations are fairly consistent at lower altitudes but are smaller than the model estimations at higher altitudes, e.g., at 65 km by about a factor of 1.5.

The GW drag shows lower correlations than the GWMF. Note, however, that the absolute GW drag is very small below about 55 km, and hence, smaller fluctuations lead to the lower correlations in the altitude range below. In particular, the patterns of alternating positive/negative drag in the altitude range between 40 km and 50 km (Fig. 16d and e) that is not seen in the JAGUAR data contributes to the low correlation.

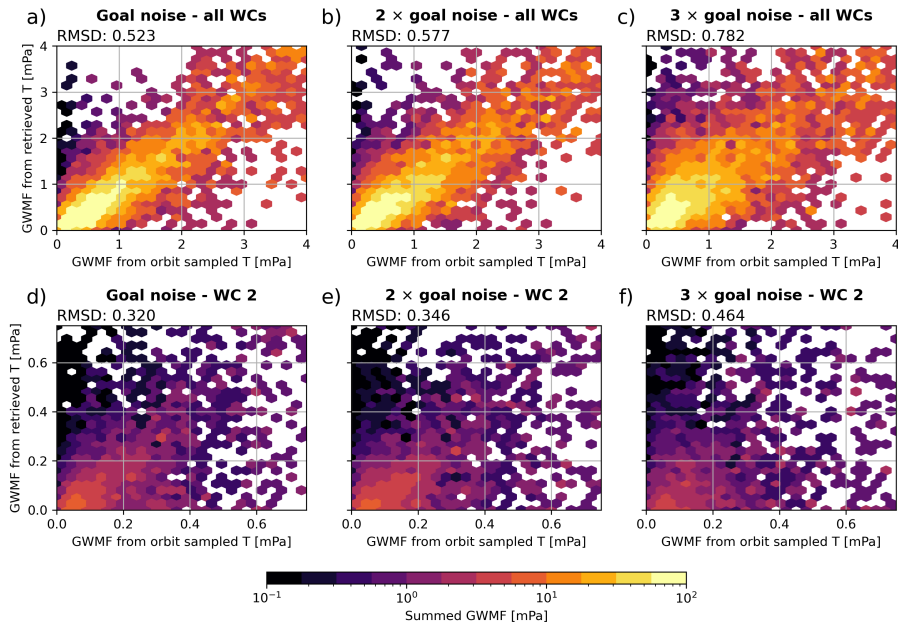

Figure R6: Comparison of the GWMF estimated from sampled temperature as reference (horizontal axis) and the retrieved temperatures with various noise levels (vertical axis). Top row shows the sum of all wave components (shown in Fig. 8), bottom row shows only the second wave component (shown in Fig. 9). The color shading shows the summed abs. GWMF of the respective bin - note the logarithmic color scale and the change in axis scales between rows.

Figure R8 shows the scatter distribution of the zonal mean zonal GWMF and GW drag estimated from the JAGUAR winds and CAIRT simulations, respectively. Note the different horizontal and vertical axes to compensate biases. The distributions are fairly straight up to the far edges. However, the CAIRT simulations underestimate the GWMF and the GW drag by about a factor of 1.5 and 2, respectively. This bias is mostly stemming from the highest altitudes, where the correlations deteriorated as well. This can be seen in the scatter distribution shown in Fig. R9 for the maps of GWMF at 70 km shown in Fig. 16, which shows a bias towards smaller GWMF in particular for regions where the GWMF in the model data is low as well. Stronger GWMF events are with lower bias and can thus be trusted in the simulated observations. This is in agreement with seeing all the strong GW events in the horizontal distribution shown in Fig. 16.

45. *Footnotes - I do not consider it necessary that the footnotes are included*

Thank you for the feedback. The footnotes are removed in the revised version.

46. *In addition to the analysis presented I would like to see it addressed in the manuscript, whether the CAIRT observations can contribute with information on short-term variability of GWD (hours, days?) and also long-term trends (Is the projected accuracy and stability of the measurements sufficient for this?)*

The CAIRT mission is planned to be at least a 5-year mission and with fuel and support for up to 10 years. Trends visible in this period could be observed, e.g., tropical GW activity. For high latitude trends, the number of observed seasons could be a limiting factor. Currently there is no reason to believe that the instrument will degrade during its deployment. The following paragraph has been added to the conclusions:

Beyond individual observations, the CAIRT mission might be able to estimate trends in GW activity during its planned lifetime of 5 years (with a threshold lifetime of up to 10 years) but this is beyond the current study. The daily global coverage allows for observation of daily variability of the global GW distributions.

## References

- A. C. Bushell, J. A. Anstey, N. Butchart, Y. Kawatani, S. M. Osprey, J. H. Richter, F. Serva, P. Braesicke, C. Cagnazzo, C.-C. Chen, H.-Y. Chun, R. R. Garcia, L. J. Gray, K. Hamilton, T. Kerzenmacher, Y.-H. Kim, F. Lott, C. McLandress, H. Naoe, J. Scinocca, A. K. Smith, T. N. Stockdale, S. Versick, S. Watanabe, K. Yoshida, and S. Yukimoto. Evaluation of the Quasi-Biennial Oscillation in global climate models for the

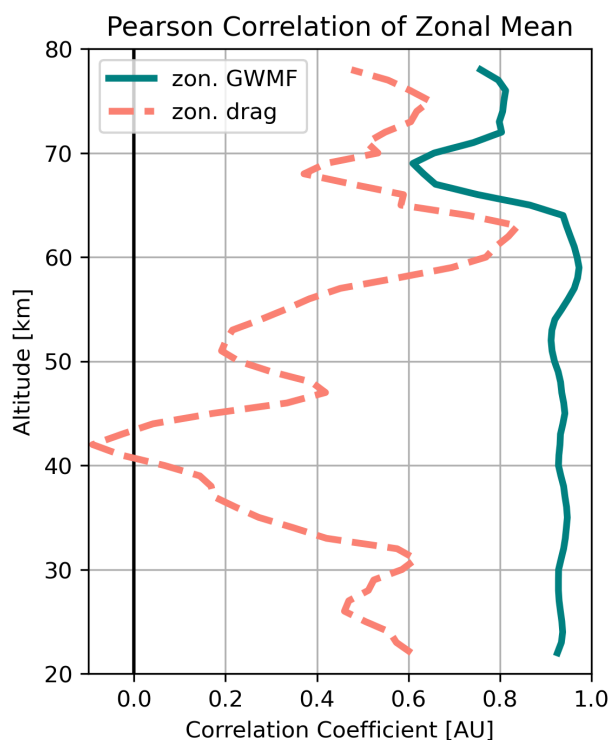

Figure R7: Correlation of GWMF (solid, teal) and GW drag (dashed, orange) between derivation from wind fluctuations and CAIRT simulations that are shown in Fig. 15 a and b and Fig. 15 c and d, respectively. Note that the absolute GW drag is small for altitudes below about 55 km.

SPARC QBO-initiative. *Quart. J. Roy. Meteorol. Soc.*, n/a(n/a), 2020. doi: <https://doi.org/10.1002/qj.3765>. URL <https://rmets.onlinelibrary.wiley.com/doi/abs/10.1002/qj.3765>.

H.-J. Choi, S.-J. Choi, M.-S. Koo, J.-E. Kim, Y. C. Kwon, and S.-Y. Hong. Effects of parameterized orographic drag on weather forecasting and simulated climatology over east asia during boreal summer. *J. Geophys. Res. Atmos.*, 122(20):10669–10678, OCT 27 2017. ISSN 2169-897X. doi: 10.1002/2017JD026696.

H.-J. Choi, J.-Y. Han, M.-S. Koo, Y.-H. Chun, Hye-Yeong Kim, and S.-Y. Hong. Effects of non-orographic gravity wave drag on seasonal and medium-range predictions in a global forecast model. *Asia-Pac. J. Atmos. Sci.*, 54(1):385–402, 2018. doi: 10.1007/s13143-018-0023-1.

M. Ern, P. Preusse, M. J. Alexander, and C. D. Warner. Absolute values of gravity wave momentum flux derived from satellite data. *J. Geophys. Res. Atmos.*, 109(D20), 2004. ISSN 2156-2202. doi: 10.1029/2004JD004752.

D. Fritts and M. Alexander. Gravity wave dynamics and effects in the middle atmosphere. *Rev. Geophys.*, 41(1), APR 16 2003. ISSN 8755-1209. doi: 10.1029/2001RG000106.

D. C. Fritts, R. B. Smith, M. J. Taylor, J. D. Doyle, S. D. Eckermann, A. Doernbrack, M. Rapp, B. P. Williams, P. D. Pautet, K. Bossert, N. R. Criddle, C. A. Reynolds, P. A. Reinecke, M. Uddstrom, M. J. Revell, R. Turner, B. Kaifler, J. S. Wagner, T. Mixa, C. G. Kruse, A. D. Nugent, C. D. Watson, S. Gisinger, S. M. Smith, R. S. Lieberman, B. Laughman, J. J. Moore, W. O. Brown, J. A. Haggerty, A. Rockwell, G. J. Stossmeister, S. F. Williams, G. Hernandez, D. J. Murphy, A. R. Klekociuk, I. M. Reid, and J. Ma. The deep propagating gravity wave experiment (DEEPWAVE): An airborne and ground-based exploration of gravity wave propagation and effects from their sources throughout the lower and middle atmosphere. *Bull. Amer. Meteor. Soc.*, 97(3):425–453, MAR 2016. ISSN 0003-0007. doi: 10.1175/BAMS-D-14-00269.1.

D. Hájková and P. Šácha. Parameterized orographic gravity wave drag and dynamical effects in CMIP6 models. *Clim. Dyn.*, 62(3):2259–2284, 2024. doi: 10.1007/s00382-023-07021-0.

M. I. Hegglin, D. Brunner, H. Wernli, C. Schwierz, O. Martius, P. Hoor, H. Fischer, U. Parchatka, N. Spelten, C. Schiller, M. Krebsbach, U. Weers, J. Staehelin, and T. Peter. Tracing troposphere-to-stratosphere transport above a mid-latitude deep convective system. *Atmos. Chem. Phys.*, 4(3):741–756, 2004. doi: 10.5194/acp-4-741-2004. URL <https://acp.copernicus.org/articles/4/741/2004/>.

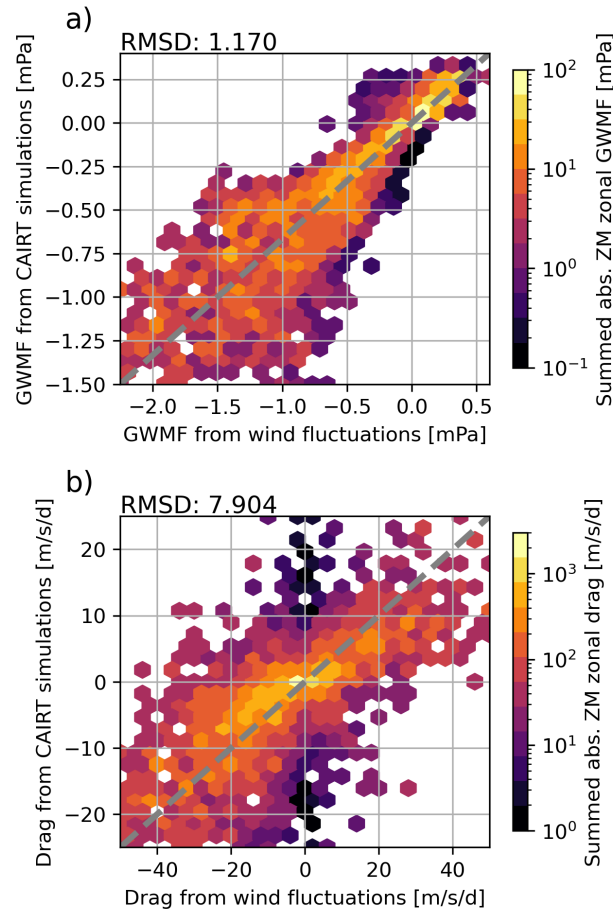

Figure R8: Scatter distribution comparing the zonal mean zonal GWMF and GW drag presented in Fig.15a and b and Fig. 15c and d, respectively. Color shading gives the total absolute zonal GWMF or GW drag in the given bin. Note the different horizontal and vertical axes.

- L.-A. Kautz, I. Polichtchouk, T. Birner, H. Garny, and J. G. Pinto. Enhanced extended-range predictability of the 2018 late-winter Eurasian cold spell due to the stratosphere. *Quart. J. Roy. Meteorol. Soc.*, 146(727, B): 1040–1055, JAN 2020. ISSN 0035-9009. doi: 10.1002/qj.3724.
- L. Krasauskas, B. Kaifler, S. Rhode, J. Ungermann, W. Woiwode, and P. Preusse. Oblique propagation and refraction of gravity waves over the Andes observed by GLORIA and ALIMA during the SouthTRAC campaign. *J. Geophys. Res. Atmos.*, page e2022JD037798, 2023. doi: 10.1029/2022JD037798.
- I. Krisch, P. Preusse, J. Ungermann, A. Dörnbrack, S. D. Eckermann, M. Ern, F. Friedl-Vallon, M. Kaufmann, H. Oelhaf, M. Rapp, C. Strube, and M. Riese. First tomographic observations of gravity waves by the infrared limb imager GLORIA. *Atmos. Chem. Phys.*, 17(24):14937–14953, 2017. doi: 10.5194/acp-17-14937-2017.
- A. Kuchar, P. Sacha, R. Eichinger, C. Jacobi, P. Pisoft, and H. E. Rieder. On the intermittency of orographic gravity wave hotspots and its importance for middle atmosphere dynamics. *Weather Clim. Dynam.*, 1(2): 481–495, 2020. doi: 10.5194/wcd-1-481-2020. URL <https://wcd.copernicus.org/articles/1/481/2020/>.
- P. Preusse, M. Ern, S. D. Eckermann, C. D. Warner, R. H. Picard, P. Knieling, M. Krebsbach, J. M. Russell III, M. G. Mlynczak, C. J. Mertens, and M. Riese. Tropopause to mesopause gravity waves in August: measurement and modeling. *J. Atm. Sol.-Terr. Phys.*, 68:1730–1751, 2006. doi: 10.1016/j.jastp.2005.10.019.
- M. Rapp, B. Kaifler, A. Dörnbrack, S. Gisinger, T. Mixa, R. Reichert, N. Kaifler, S. Knobloch, R. Eckert, N. Wildmann, A. Giez, L. Krasauskas, P. Preusse, M. Geldenhuys, M. Riese, W. Woiwode, F. Friedl-Vallon, B.-M. Sinnhuber, A. de la Torre, P. Alexander, J. L. Hormaechea, D. Janches, M. Garhammer, J. L. Chau, J. F. Conte, P. Hoor, and A. Engel. SOUTHTRAC-GW: An airborne field campaign to explore gravity wave dynamics at the world’s strongest hotspot. *Bull. Amer. Meteor. Soc.*, 102(4):E871 – E893, 2021. doi: 10.1175/BAMS-D-20-0034.1.
- J. H. Richter, N. Butchart, Y. Kawatani, A. C. Bushell, L. Holt, F. Serva, J. Anstey, I. R. Simpson, S. Osprey, K. Hamilton, P. Braesicke, C. Cagnazzo, C.-C. Chen, R. R. Garcia, L. J. Gray, T. Kerzenmacher,

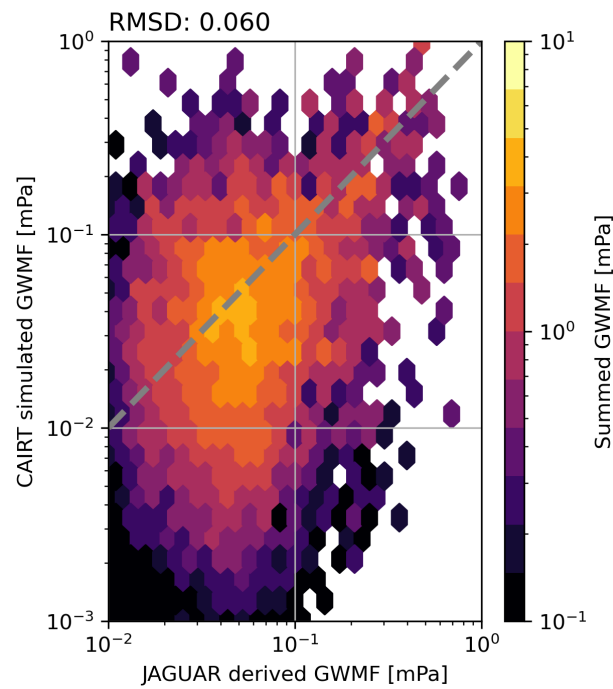

Figure R9: Scatter distribution of GWMF estimated from JAGUAR (horizontal axis) and CAIRT simulations (vertical axis) at 70 km shown in Fig. 16. Color shading shows the summed GWMF in the respective bin. Note the logarithmic scale.

F. Lott, C. McLandress, H. Naoe, J. Scinocca, T. N. Stockdale, S. Versick, S. Watanabe, K. Yoshida, and S. Yukimoto. Response of the quasi-biennial oscillation to a warming climate in global climate models. *Quart. J. Roy. Meteorol. Soc.*, n/a(n/a), 2020. doi: <https://doi.org/10.1002/qj.3749>. URL <https://rmets.onlinelibrary.wiley.com/doi/abs/10.1002/qj.3749>.

M. R. Schoeberl and P. A. Newman. A multiple-level trajectory analysis of vortex filaments. *J. Geophys. Res. Atmos.*, 100(D12):25801–25815, 1995. doi: <https://doi.org/10.1029/95JD02414>. URL <https://agupubs.onlinelibrary.wiley.com/doi/abs/10.1029/95JD02414>.

M. Sigmond, J. Anstey, V. Arora, R. Digby, N. Gillett, V. Kharin, W. Merryfield, C. Reader, J. Scinocca, N. Swart, J. Virgin, C. Abraham, J. Cole, N. Lambert, W.-S. Lee, Y. Liang, E. Malinina, L. Rieger, K. von Salzen, C. Seiler, C. Seinen, A. Shao, R. Sospedra-Alfonso, L. Wang, and D. Yang. Improvements in the Canadian Earth System Model (CanESM) through systematic model analysis: CanESM5.0 and CanESM5.1. *Geosci. Model Dev.*, 16(22):6553–6591, NOV 15 2023. ISSN 1991-959X. doi: 10.5194/gmd-16-6553-2023.
